## Erratum: Good to Know: Understanding Your A1C Test. Clin Diabetes 2023;41:125–126

<https://doi.org/10.2337/cd23-er02>

A graphic on this patient information handout included an incorrect average blood glucose value to correspond to an A1C of 9%. The correct average glucose value is 212 mg/dL, and the corrected graphic is shown below. The online version of this article (<https://doi.org/10.2337/cd23-pe01>) has been updated to reflect this change.

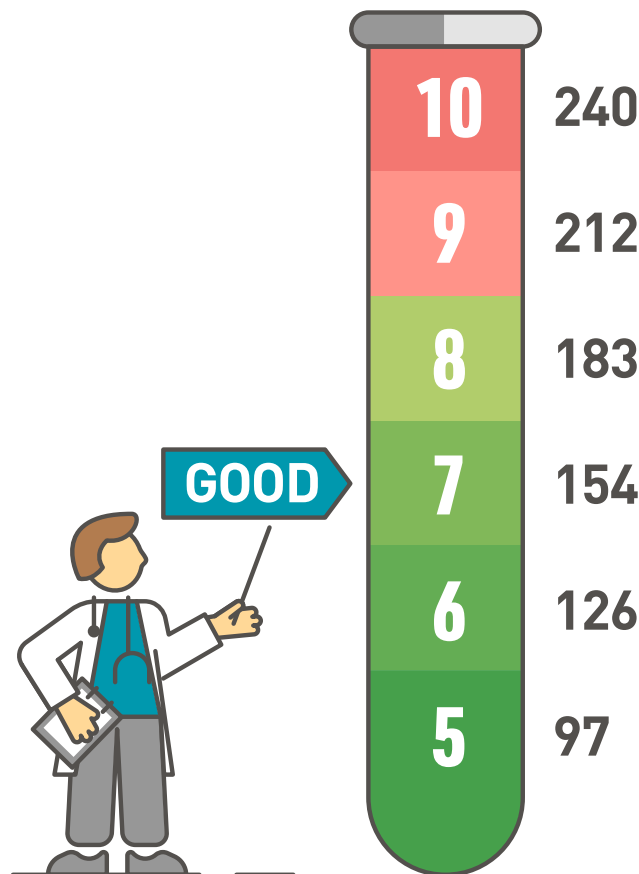

Source: https://ada.silverchair.com/clinical/article-pdf/41/2/327/725797/diaclincd23er02.pdf
